# Supplementary material for: Hydrophobic deep eutectic solvents as emerging green reaction media for biocatalytic processes: impacts of solvent properties and compositions
Source: Royal Society of Chemistry journal article supplement (doi:10.1039/d4gc02467b), 2024-01-01
Supplement: d4gc02467b1.pdf [file d4gc02467b1.pdf]

## Supporting Information

# Hydrophobic deep eutectic solvents as an emerging green reaction medium for biocatalytic processes: Impacts of solvent properties and compositions

Kang-Hong Wang,<sup>a</sup> Cheng Yang,<sup>a</sup> Guo-Bin Liang,<sup>a</sup> Ying-Fen Meng,<sup>b</sup> Yong Zou,<sup>b</sup> Shuangfei Li,<sup>a</sup> Zhen Yang<sup>a\*</sup>

<sup>a</sup>College of Life Sciences and Oceanography, Shenzhen University, Shenzhen 518055, Guangdong, China.

<sup>b</sup>School of Pharmaceutical Sciences, Sun Yat-Sen University, Guangzhou 510006, Guangdong, China.

\*Corresponding author: Zhen Yang, Ph.D., Professor

Address: College of Life Sciences and Oceanography, Shenzhen University, 1066 Xue Yuan Avenue, Shenzhen 518055, Guangdong, China.

Tel.: +86 755 2641 2791

Fax: +86 755 2653 4277

E-mail: zyang@szu.edu.cn

### Supporting information contents: (total 7 pages)

1. The yields obtained in 24 h from the acylation reaction to produce tyrosol acetate in hydrophilic and hydrophobic DESs (Table S1)
2. Effect of water addition on the enzymatic synthesis of tyrosol decanoate in DecA-based HDES (Fig. S1)
3. Measurement of the solvent properties (Fig. S2)
4. Structural analysis of HDES and discussion about the H-bonding interactions in the HDES (Fig. S3)

References

1. Table S1. The yields obtained in 24 h from the acylation reaction to produce tyrosol acetate in hydrophilic and hydrophobic DESs

| Hydrophilic DES | Hydrophobic DES            | Yield (%) |
|-----------------|----------------------------|-----------|
| Pro/G (1:2)     |                            | 4.0%      |
| Bet/G (1:2)     |                            | 0         |
| ChCl/LA (1:1)   |                            | 0         |
| ChCl/U (1:2)    |                            | 5.4%      |
| ChCl/G (1:2)    |                            | 0         |
| ChCl/EG (1:2)   |                            | 0         |
| ChAc/U (1:2)    |                            | 0         |
| ChAc/G (1:2)    |                            | 0         |
| ChAc/EG (1:2)   |                            | 0         |
| ChAc/A (1:2)    |                            | 0         |
|                 | Men/Ner (1:2)              | 61.8      |
|                 | Men/ <i>t</i> -BuOH (1:2)  | 45.8      |
|                 | Men/2M2B (1:2)             | 56.1      |
|                 | Men/ <i>c</i> Hex (1:2)    | 1.4       |
|                 | Men/Cin (1:2)              | 58.7      |
|                 | Men/Ibu (1:2)              | 24.5      |
|                 | Men/Lid (1:2)              | 42.4      |
|                 | Men/Dec (1:2)              | 0.3       |
|                 | Men/Thy (1:2)              | 69.5      |
|                 | DecA/Hex (1:2)             | 0         |
|                 | DecA/Oct (1:2)             | 0         |
|                 | DecA/Dec (1:2)             | 0         |
|                 | DecA/Ger (1:2)             | 14.1      |
|                 | DecA/Ner (1:2)             | 20.5      |
|                 | DecA/Lin (1:2)             | 16.2      |
|                 | DecA/Thy (1:2)             | 14.2      |
|                 | DecA/Men (1:2)             | 2.4       |
|                 | DecA/N44Br (2:1)           | 21.6      |
|                 | DecA/N88Br (2:1)           | 10.3      |
|                 | DecA/ <i>t</i> -BuOH (1:2) | 11.1      |
|                 | DecA/2M2B (1:2)            | 13.6      |

Reactions were carried out by adding 20 mg Novozym 435 to 2 mL of a DES containing 5 mM tyrosol and 25 mM vinyl acetate, with agitation of 250 rpm at 40 °C for 24 h.

Abbreviations: Pro = proline, Bet = betaine, G = glycerol, U = urea, A = acetamide, EG = ethylene glycol, ChCl = choline chloride, ChAc = choline acetate, LA = lactic acid, Cin = cinnamaldehyde, Ibu = ibuprofen, Lid = lidocaine, Thy = thymol, Men = menthol, Ner = nerolidol, Lin = linalool, Ger = geraniol, *t*-BuOH = *tert*-butanol, 2M2B = 2-methyl-2-butanol, DecA = 1-decanoic acid, Hex = 1-hexanol, Oct = 1-octanol, Dec = 1-decanol, *c*Hex = cyclohexanol, N44Br = tetrabutylammonium bromide, N88Br = tetraoctylammonium bromide.

## 2. Effect of water addition on the enzymatic synthesis of tyrosol decanoate in DecA-based HDES

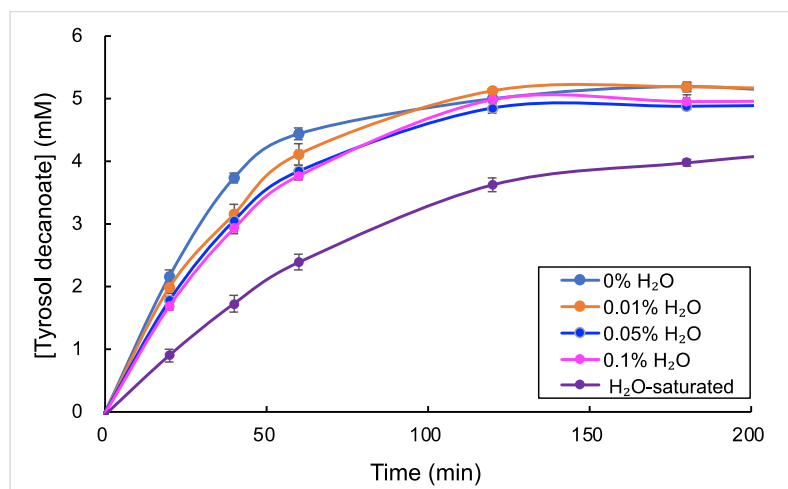

Figure S1. Impact of water content on the acylation reaction in HDES

Five tyrosol solutions (5.0 mM) were prepared in water-saturated DecA/Ner (1:2), and in the molecular sieve-dried HDES with addition of 0, 0.01%, 0.05% and 0.1% (v/v) water. Novozym 435 (20 mg) was added to 2.0 mL of each of these tyrosol solutions, and the reactions were carried out at 40 °C with agitation of 250 rpm.

## 3. Measurement of the solvent properties

The densities and viscosities of the DESs were detected by using a multifunctional electronic densimeter (MH-300G) and a digital display rotary viscometer (NDJ-9S), respectively, from the Shanghai Lichen Bangxi Instrument Technology Co. Ltd., China.

The procedure of detecting the solubility of the substrate, tyrosol, in a DES was as follows: Excess amount of tyrosol was first added to a glass bottle followed by addition of 5 mL of a DES, the mixture was then mixed thoroughly with a vortex mixer for 5 min before being incubated at 25 °C for 24 h. The supernatant was then subjected to HPLC analysis.<sup>1</sup>

The polarity of a DES was estimated by measuring the maximum absorption wavelength ( $\lambda_{\max}$ ) of the solvent containing a solvachromic dye, Nile Red (NR), in a concentration of  $\sim 15$   $\mu\text{M}$ , using a Shimadzu UV-1800 UV-Vis spectrophotometer.<sup>1</sup> The  $\lambda_{\max}$  is positively related to the polarity of the solvent.<sup>2</sup> As the molar electronic transition energy of the dye (Nile Red in our case) in the solvent,  $E_T(\text{NR})$  is employed to express the polarity of the solvent based on the equation  $E_T(\text{NR}) = 28591/\lambda_{\max}$ .<sup>3</sup> Lower  $E_T(\text{NR})$  values imply higher polarity of the solvent.

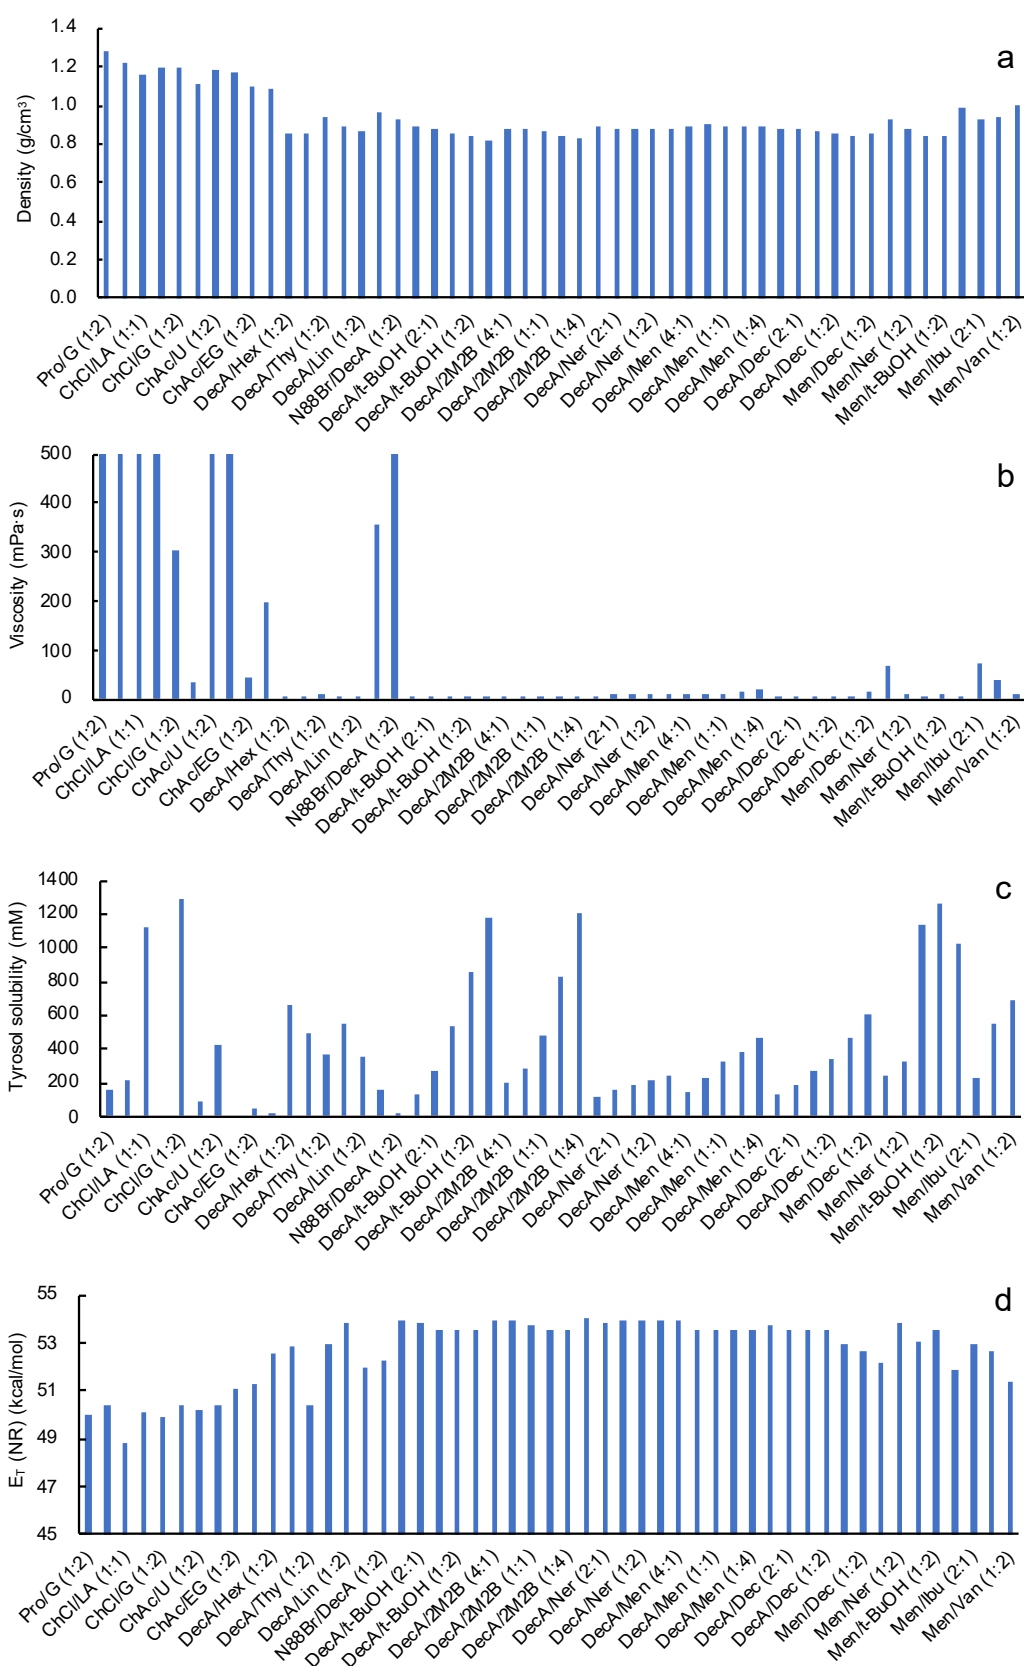

Figure S2. Physicochemical properties of DESs. a. density; b. viscosity; c. tyrosol solubility; d. polarity

#### 4. Structural analysis of HDES and discussion about the H-bonding interactions in the HDES

##### 4.1 Structural analysis with FT-IR and $^1\text{H-NMR}$

Fourier transform infrared (FTIR) spectroscopy (Nicolet iS50, Thermo Scientific) and  $^1\text{H}$ -nuclear magnetic resonance (NMR) spectroscopy (Avance III 500 MHz, Bruker) were used to study the interactions involved in the HDES.

##### 4.2 FT-IR and $^1\text{H-NMR}$ spectra

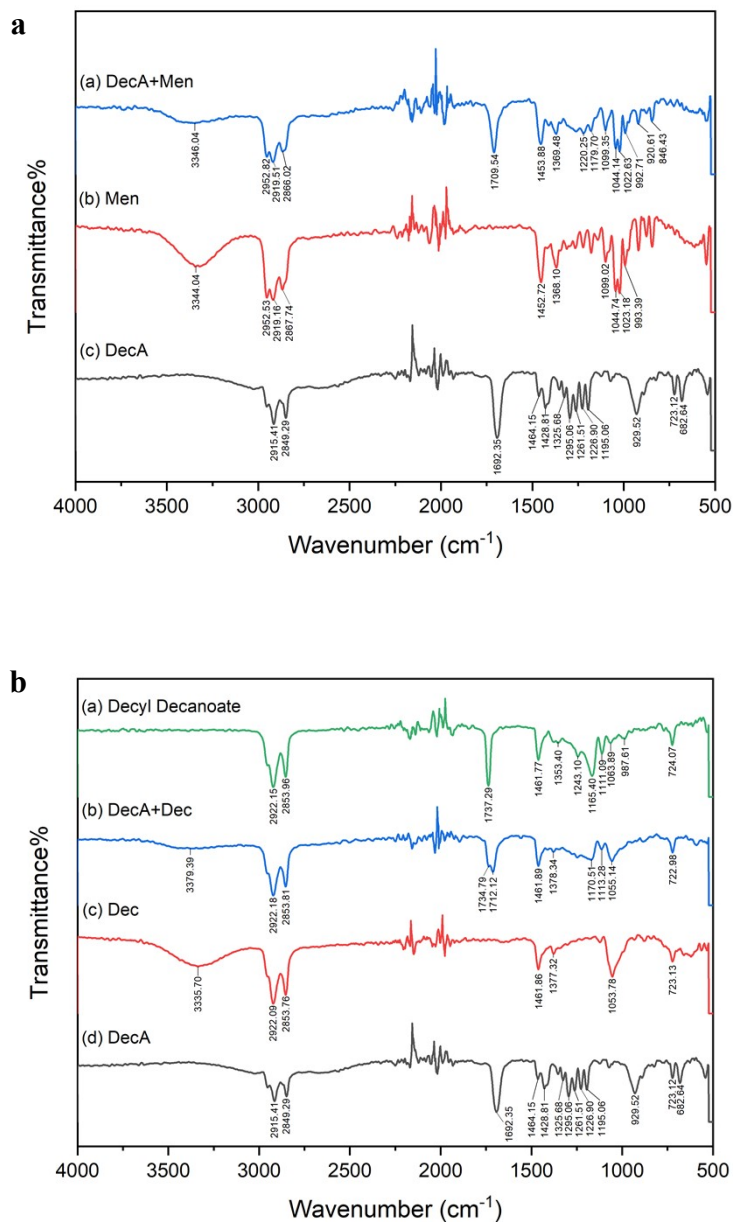

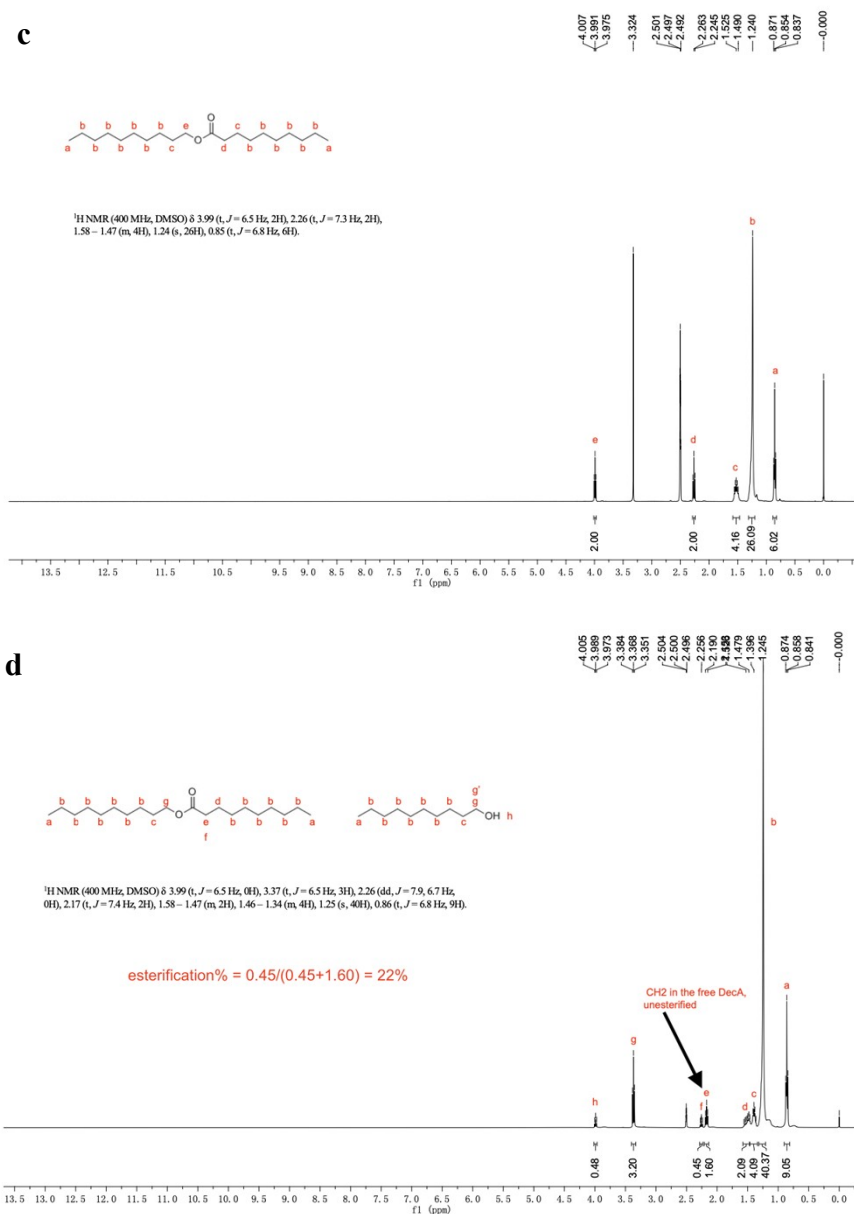

Figure S3. Structural analyses of HDESs

- FT-IR spectra of the HDES DecA/Men (1:2) and its two components, decanoic acid (DecA) and DL-menthol (Men);
- FT-IR spectra of the standard sample of decyl decanoate, the HDES DecA/Dec (1:2) and its two components, DecA and 1-decanol (Dec);
- <sup>1</sup>H-NMR spectra of the standard sample of decyl decanoate;
- <sup>1</sup>H-NMR spectra of DecA/Dec (1:2).

### 4.3 A discussion

The FT-IR spectra of all the DecA/alcohol HDESs, except DecA/Dec (1:2), were similar as the one presented in Fig. S3a for DecA/Men (1:2), showing a sharp peak at  $\sim 1710\text{ cm}^{-1}$ . The carbonyl stretching vibration peak for the free decanoic acid is originally located at a lower wavelength ( $1692\text{ cm}^{-1}$ ). A blue shift from  $1692\text{ cm}^{-1}$  to  $1710\text{ cm}^{-1}$  indicates strongly a new hydrogen bond formation,<sup>4,5</sup> thus confirming the H-bond interactions in the HDES.

For DecA/Dec (1:2), however, beside the sharp peak at 1712 cm<sup>-1</sup> there is a shoulder peak appearing at 1735 cm<sup>-1</sup>(Fig. S3b), which is the stretching vibration peak characteristic for the C=O double bond in an ester linkage. A strong absorption peak at 1737 cm<sup>-1</sup> is indeed observed for the standard sample of decyl decanoate. This suggests that while most of decanoic acid present in the HDES is involved in the H-bonding interactions with decanol, another component of the HDES, a small portion of decanoic acid is already esterified with decanol. The <sup>1</sup>H-NMR spectrum of the HDES (Fig. S3d) further reveals that 22% of decanoic acid is present as an ester, calculated from the ratio of the integral areas.

## References

- (1) K.-H. Wang, S. Li, Y.-F. Meng, Y. Zou, G.-B. Liang, C. Yang and Z. Yang, *Z. Biocat. Biotransf.*, 2024 (in press) <https://doi.org/10.1080/10242422.2024.2312977>.
- (2) R. Craveiro, I. Aroso, V. Flammia, T. Carvalho, M. T. Viciosa, M. Dionísio, S. Barreiros, R. L. Reis, A. R. C. Duarte and A. Paiva, *J. Mol. Liquids*, 2016, **215**, 534–540.
- (3) C. Reichardt, *Green Chem.*, 2005, **7**, 339–351.
- (4) B. D. Ribeiro, C. Florindo, L. C. Iff, M. A. Z. Coelho and I. M. Marrucho, *ACS Sustainable Chem. Eng.*, 2015, **3**, 2469–2477.
- (5) A. Huang, W. Deng, X. Li, Q. Zheng, X. Wang and Y. Xiao, *J. Pharmaceutical Anal.*, 2022, **12**, 87–95.
